# Supplementary material for: Artificial Neural Networks Predicted the Overall Survival and Molecular Subtypes of Diffuse Large B-Cell Lymphoma Using a Pancancer Immune-Oncology Panel
Source: MDPI journal article supplement (doi:10.3390/cancers13246384), 2021-12-20
Supplement: s1 [file s1]

## Supplementary Material

### **List of housekeeping genes of the PanCancer Immune Profiling panel**

1. *ABCF1*
2. *AGK*
3. *ALAS1*
4. *AMMECR1L*
5. *CC2D1B*
6. *CNOT10*
7. *CNOT4*
8. *COG7*
9. *DDX50*
10. *DHX16*
11. *DNAJC14*
12. *EDC3*
13. *EIF2B4*
14. *ERCC3*
15. *FCF1*
16. *G6PD*
17. *GPATCH3*
18. *GUSB*
19. *HDAC3*
20. *HPRT1*
21. *MRPS5*
22. *MTMR14*
23. *NOL7*
24. *NUBP1*
25. *POLR2A*
26. *PPIA*
27. *PRPF38A*
28. *SAP130*
29. *SDHA*
30. *SF3A3*
31. *TBP*
32. *TLK2*
33. *TMUB2*

- 34. *TRIM39*
- 35. *TUBB*
- 36. *USP39*
- 37. *ZC3H14*
- 38. *ZKSCAN5*
- 39. *ZNF143*
- 40. *ZNF346*

### **Logistic regression**

#### **1. Equation dead overall survival outcome:**

-100.7 \* A2M +  
-60.67 \* ABCB1 +  
-107.3 \* ABL1 +  
-2.179 \* ADA +  
-12.71 \* ADORA2A +  
39.28 \* AICDA +  
54.68 \* AIRE +  
-65.65 \* AKT3 +  
26.36 \* ALCAM +  
79.26 \* AMBP +  
42.25 \* AMICA1 +  
158.1 \* ANP32B +  
54.17 \* ANXA1 +  
29.06 \* APOE +  
19.04 \* APP +  
-21.68 \* ARG1 +  
-115.5 \* ARG2 +  
-95.3 \* ATF1 +  
11.53 \* ATF2 +  
-92.44 \* ATG10 +  
60.91 \* ATG12 +  
252.4 \* ATG16L1 +  
-115.1 \* ATG5 +  
-9.984 \* ATG7 +  
42.73 \* ATM +

-25.74 \* AXL +  
56.87 \* BAGE +  
-35.01 \* BATF +  
-47.85 \* BAX +  
-236.0 \* BCL10 +  
54.57 \* BCL2 +  
-18.24 \* BCL2L1 +  
-2.471 \* BCL6 +  
33.2 \* BID +  
-105.8 \* BIRC5 +  
-0.6957 \* BLK +  
-48.86 \* BLNK +  
28.65 \* BMI1 +  
32.92 \* BST1 +  
30.19 \* BST2 +  
-123.1 \* BTK +  
-8.602 \* BTLA +  
9.881 \* C1QA +  
21.54 \* C1QB +  
109.7 \* C1QBP +  
-12.9 \* C1R +  
150.3 \* C1S +  
-19.62 \* C2 +  
65.52 \* C3 +  
20.26 \* C3AR1 +  
-55.13 \* C4B +  
50.77 \* C4BPA +  
-8.163 \* C5 +  
-10.14 \* C6 +  
9.298 \* C7 +  
-9.457 \* C8A +  
83.46 \* C8B +  
-94.95 \* C8G +  
20.22 \* C9 +  
-44.28 \* CAMP +  
27.56 \* CARD11 +

-105.5 \* CARD9 +  
63.47 \* CASP1 +  
65.38 \* CASP10 +  
114.9 \* CASP3 +  
-142.3 \* CASP8 +  
-64.38 \* CCL1 +  
-37.1 \* CCL11 +  
-17.69 \* CCL13 +  
4.887 \* CCL14 +  
-9.589 \* CCL15 +  
127.2 \* CCL16 +  
10.07 \* CCL17 +  
-31.86 \* CCL18 +  
-65.17 \* CCL19 +  
56.45 \* CCL2 +  
-5.474 \* CCL20 +  
-50.11 \* CCL21 +  
28.17 \* CCL22 +  
0.1598 \* CCL23 +  
26.5 \* CCL24 +  
77.66 \* CCL25 +  
21.0 \* CCL26 +  
-49.97 \* CCL27 +  
-89.75 \* CCL28 +  
157.7 \* CCL3 +  
-325.9 \* CCL3L1 +  
253.0 \* CCL4 +  
-120.0 \* CCL5 +  
-70.36 \* CCL7 +  
-31.38 \* CCL8 +  
-123.3 \* CCND3 +  
5.925 \* CCR1 +  
30.56 \* CCR2 +  
7.664 \* CCR3 +  
6.176 \* CCR4 +  
-27.38 \* CCR5 +

27.87 \* CCR6 +  
-34.18 \* CCR7 +  
16.58 \* CCR9 +  
98.48 \* CCRL2 +  
-80.83 \* CD14 +  
47.14 \* CD160 +  
19.1 \* CD163 +  
+ 1099.0

## 2. Logistic regression for molecular subtype

### Equation for ABC subtype:

-179.7 \* A2M +  
-219.5 \* ABCB1 +  
-290.6 \* ABL1 +  
-266.5 \* ADA +  
-234.8 \* ADORA2A +  
157.2 \* AICDA +  
87.06 \* AIRE +  
1.88 \* AKT3 +  
-38.95 \* ALCAM +  
579.5 \* AMBP +  
285.0 \* AMICA1 +  
1156.7 \* ANP32B +  
305.8 \* ANXA1 +  
-37.53 \* APOE +  
-541.6 \* APP +  
-309.2 \* ARG1 +  
-81.69 \* ARG2 +  
-733.7 \* ATF1 +  
102.2 \* ATF2 +  
-822.8 \* ATG10 +  
249.9 \* ATG12 +  
576.2 \* ATG16L1 +  
-393.7 \* ATG5 +  
287.4 \* ATG7 +  
396.8 \* ATM +  
447.7 \* AXL +

-325.0 \* BAGE +  
-131.8 \* BATF +  
726.6 \* BAX +  
-827.6 \* BCL10 +  
-28.64 \* BCL2 +  
-141.6 \* BCL2L1 +  
-103.8 \* BCL6 +  
269.0 \* BID +  
60.69 \* BIRC5 +  
-142.3 \* BLK +  
-121.8 \* BLNK +  
761.9 \* BMI1 +  
18.37 \* BST1 +  
489.5 \* BST2 +  
-32.64 \* BTK +  
-63.68 \* BTLA +  
620.4 \* C1QA +  
-231.0 \* C1QB +  
-456.3 \* C1QBP +  
-857.7 \* C1R +  
1065.3 \* C1S +  
-1031.0 \* C2 +  
207.3 \* C3 +  
298.2 \* C3AR1 +  
-53.56 \* C4B +  
627.3 \* C4BPA +  
-110.9 \* C5 +  
29.37 \* C6 +  
-26.44 \* C7 +  
-495.5 \* C8A +  
148.0 \* C8B +  
-494.1 \* C8G +  
302.2 \* C9 +  
-91.05 \* CAMP +  
-67.44 \* CARD11 +  
-236.6 \* CARD9 +

394.5 \* CASP1 +  
-302.3 \* CASP10 +  
-345.3 \* CASP3 +  
-464.5 \* CASP8 +  
-177.0 \* CCL1 +  
-19.48 \* CCL11 +  
-158.2 \* CCL13 +  
-64.83 \* CCL14 +  
-47.47 \* CCL15 +  
592.1 \* CCL16 +  
132.4 \* CCL17 +  
-155.2 \* CCL18 +  
-270.4 \* CCL19 +  
333.4 \* CCL2 +  
31.72 \* CCL20 +  
-38.49 \* CCL21 +  
73.09 \* CCL22 +  
423.8 \* CCL23 +  
-132.4 \* CCL24 +  
-42.2 \* CCL25 +  
28.45 \* CCL26 +  
-213.9 \* CCL27 +  
-329.9 \* CCL28 +  
643.5 \* CCL3 +  
-1312.9 \* CCL3L1 +  
1235.5 \* CCL4 +  
-527.8 \* CCL5 +  
64.86 \* CCL7 +  
67.21 \* CCL8 +  
-86.9 \* CCND3 +  
-294.3 \* CCR1 +  
354.1 \* CCR2 +  
209.7 \* CCR3 +  
-3.327 \* CCR4 +  
-239.2 \* CCR5 +  
-53.42 \* CCR6 +

-246.1 \* CCR7 +  
32.14 \* CCR9 +  
-104.9 \* CCRL2 +  
-0.7647 \* CD14 +  
75.37 \* CD160 +  
+ 1691.5

### **Equation For Unspecified**

-112.7 \* A2M +  
-134.9 \* ABCB1 +  
-165.3 \* ABL1 +  
-141.5 \* ADA +  
-126.9 \* ADORA2A +  
89.61 \* AICDA +  
31.16 \* AIRE +  
-5.653 \* AKT3 +  
-25.63 \* ALCAM +  
307.9 \* AMBP +  
160.3 \* AMICA1 +  
633.7 \* ANP32B +  
158.1 \* ANXA1 +  
-24.92 \* APOE +  
-268.3 \* APP +  
-162.0 \* ARG1 +  
-50.57 \* ARG2 +  
-419.9 \* ATF1 +  
75.38 \* ATF2 +  
-440.6 \* ATG10 +  
151.3 \* ATG12 +  
339.6 \* ATG16L1 +  
-226.1 \* ATG5 +  
128.5 \* ATG7 +  
229.7 \* ATM +  
247.1 \* AXL +  
-171.4 \* BAGE +



-77.18 \* BATF +  
362.5 \* BAX +  
-476.6 \* BCL10 +  
-5.718 \* BCL2 +  
-83.2 \* BCL2L1 +  
-54.88 \* BCL6 +  
148.0 \* BID +  
23.99 \* BIRC5 +  
-75.49 \* BLK +  
-62.61 \* BLNK +  
412.5 \* BMI1 +  
15.79 \* BST1 +  
276.6 \* BST2 +  
-39.21 \* BTK +  
-33.51 \* BTLA +  
311.9 \* C1QA +  
-102.7 \* C1QB +  
-222.3 \* C1QBP +  
-442.8 \* C1R +  
555.5 \* C1S +  
-547.6 \* C2 +  
116.3 \* C3 +  
178.3 \* C3AR1 +  
-39.22 \* C4B +  
340.1 \* C4BPA +  
-51.02 \* C5 +  
17.51 \* C6 +  
-16.45 \* C7 +  
-271.0 \* C8A +  
102.0 \* C8B +  
-270.9 \* C8G +  
144.0 \* C9 +  
-49.41 \* CAMP +  
-24.22 \* CARD11 +  
-137.6 \* CARD9 +  
216.3 \* CASP1 +

-152.5 \* CASP10 +  
-160.3 \* CASP3 +  
-268.0 \* CASP8 +  
-98.1 \* CCL1 +  
-7.844 \* CCL11 +  
-83.4 \* CCL13 +  
-30.89 \* CCL14 +  
-18.98 \* CCL15 +  
329.7 \* CCL16 +  
72.76 \* CCL17 +  
-80.73 \* CCL18 +  
-144.0 \* CCL19 +  
187.9 \* CCL2 +  
15.88 \* CCL20 +  
-19.65 \* CCL21 +  
43.97 \* CCL22 +  
218.8 \* CCL23 +  
-77.53 \* CCL24 +  
-11.89 \* CCL25 +  
21.61 \* CCL26 +  
-117.6 \* CCL27 +  
-179.1 \* CCL28 +  
365.7 \* CCL3 +  
-740.3 \* CCL3L1 +  
685.8 \* CCL4 +  
-291.6 \* CCL5 +  
26.67 \* CCL7 +  
16.13 \* CCL8 +  
-61.09 \* CCND3 +  
-132.3 \* CCR1 +  
181.8 \* CCR2 +  
118.1 \* CCR3 +  
-5.648 \* CCR4 +  
-115.5 \* CCR5 +  
-20.19 \* CCR6 +  
-134.3 \* CCR7 +

19.09 \* CCR9 +  
-30.23 \* CCRL2 +  
-34.59 \* CD14 +  
42.79 \* CD160 +  
+ 1196.5

### 3. Logistic regression molecular subtype 2

#### Equation for ABC+Unspecified

-199.5 \* A2M +  
-241.8 \* ABCB1 +  
-311.4 \* ABL1 +  
-278.9 \* ADA +  
-247.3 \* ADORA2A +  
168.6 \* AICDA +  
81.2 \* AIRE +  
-2.406 \* AKT3 +  
-44.02 \* ALCAM +  
606.5 \* AMBP +  
304.1 \* AMICA1 +  
1223.4 \* ANP32B +  
317.2 \* ANXA1 +  
-42.56 \* APOE +  
-554.1 \* APP +  
-322.1 \* ARG1 +  
-90.22 \* ARG2 +  
-787.8 \* ATF1 +  
120.8 \* ATF2 +  
-863.5 \* ATG10 +  
273.8 \* ATG12 +  
625.1 \* ATG16L1 +  
-423.3 \* ATG5 +  
284.9 \* ATG7 +  
427.8 \* ATM +  
474.7 \* AXL +  
-339.3 \* BAGE +  
-142.6 \* BATF +  
745.0 \* BAX +

-890.6 \* BCL10 +  
-23.73 \* BCL2 +  
-153.5 \* BCL2L1 +  
-108.5 \* BCL6 +  
284.9 \* BID +  
58.1 \* BIRC5 +  
-148.9 \* BLK +  
-126.1 \* BLNK +  
802.6 \* BMI1 +  
23.2 \* BST1 +  
523.3 \* BST2 +  
-48.55 \* BTK +  
-66.45 \* BTLA +  
637.7 \* C1QA +  
-228.6 \* C1QB +  
-464.3 \* C1QBP +  
-889.4 \* C1R +  
1108.2 \* C1S +  
-1079.1 \* C2 +  
221.0 \* C3 +  
325.2 \* C3AR1 +  
-63.14 \* C4B +  
661.1 \* C4BPA +  
-110.9 \* C5 +  
32.0 \* C6 +  
-29.25 \* C7 +  
-523.8 \* C8A +  
170.3 \* C8B +  
-522.7 \* C8G +  
305.4 \* C9 +  
-95.99 \* CAMP +  
-62.96 \* CARD11 +  
-255.5 \* CARD9 +  
417.4 \* CASP1 +  
-311.1 \* CASP10 +  
-346.2 \* CASP3 +

-500.2 \* CASP8 +  
-187.9 \* CCL1 +  
-18.74 \* CCL11 +  
-165.1 \* CCL13 +  
-65.52 \* CCL14 +  
-45.58 \* CCL15 +  
629.7 \* CCL16 +  
140.2 \* CCL17 +  
-161.3 \* CCL18 +  
-283.2 \* CCL19 +  
356.1 \* CCL2 +  
32.56 \* CCL20 +  
-39.76 \* CCL21 +  
79.89 \* CCL22 +  
439.4 \* CCL23 +  
-143.3 \* CCL24 +  
-37.25 \* CCL25 +  
34.05 \* CCL26 +  
-226.5 \* CCL27 +  
-347.8 \* CCL28 +  
689.3 \* CCL3 +  
-1402.4 \* CCL3L1 +  
1312.6 \* CCL4 +  
-559.8 \* CCL5 +  
62.77 \* CCL7 +  
57.48 \* CCL8 +  
-100.8 \* CCND3 +  
-292.2 \* CCR1 +  
366.5 \* CCR2 +  
223.9 \* CCR3 +  
-6.035 \* CCR4 +  
-242.8 \* CCR5 +  
-50.53 \* CCR6 +  
-260.0 \* CCR7 +  
34.97 \* CCR9 +  
-93.01 \* CCRL2 +

$$\begin{aligned} & -23.28 * CD14 + \\ & 80.7 * CD160 + \\ & + 1973.6 \end{aligned}$$
